# Supplementary material
Source: PubMed Central journal article supplement (PMC5836722)

**A** Male Rats N=50

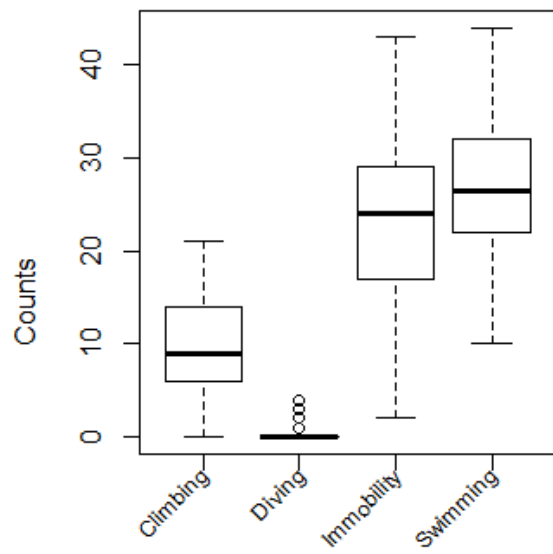

**B** Female Rats N=50

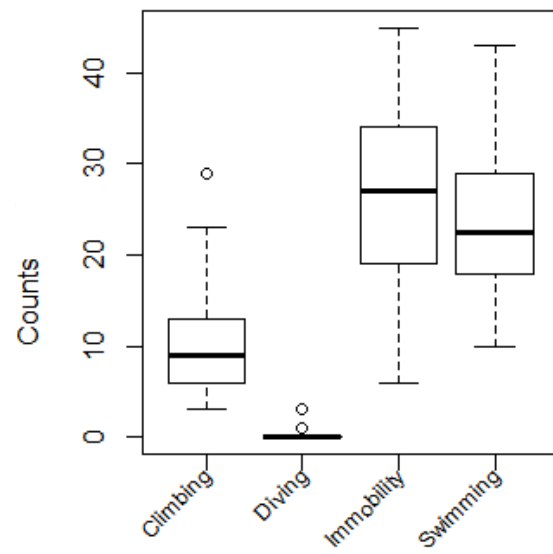

Supplement: NIHMS945319-supplement-Figure_S1.pdf [file NIHMS945319-supplement-Figure_S1.pdf]
